# Supplementary material for: Expression patterns of risk genes associated with three evolutionarily relevant syndromes in rhesus macaque and human brains
Source: Research Square preprint supplement (doi:10.21203/rs.3.rs-7922078/v1), 2025-11-21
Supplement: Supplementary file 2 [file 7cb4be24466790300273851c.xlsx]

## Sheet: Title Page
Supplementary Data Files
Expression patterns of risk genes associated with three evolutionarily relevant syndromes in rhesus macaque and human brains
Authors:
Kalyani B. Karunakaran1*, Meera Purushottam1, N. Balakrishnan2, Biju Viswanath1*, Ken-ichi Amemori3, Sanjeev Jain1
Affiliations:
1 Molecular Genetics Lab, Department of Psychiatry, National Institute of Mental Health and Neurosciences, Bangalore, India
2 Supercomputer Education and Research Centre, Indian Institute of Science, Bangalore, India
3 Institute for the Advanced Study of Human Biology, Kyoto University, Kyoto, Japan
*Correspondence to: Kalyani B. Karunakaran (kalyanithepebble@gmail.com) and Biju Viswanath (bijuv1@gmail.com)
This file contains:
o Supplementary Data File 1

## Sheet: Supplementary Data File 1
Supplementary Data File 1: Genes associated with the three syndromes collected from the GWAS catalog
Schizophrenia	Alzheimer's disease	Depression
ZKSCAN3	TOMM40	AADAT
OR2G1P	FBXL13	AATK
ZNF311	APOE	ABCF1
OR12D3	PAX5	ABT1
ZKSCAN4	APOC1	ACADS
TRIM27	KBTBD8	ACTG1P22
HIST1H3PS1	LOC101928519	ACTR5
LOC100507362	D21S2088E	ACVR1B
TRIM26	TNXB	ADARB1
HIST1H2AJ	LHX1	ADGRG6
COX11P1	SFSWAP	ADH5P4
TRNAS17	BCAM	AK294384
DPCR1	TRH	AKAP8P1
ARL3	MAPK7	ANKK1
HSPA1A	C17orf96	AREL1
HLA-B	ANTXR1	ARFGEF2
CACNA1C	LINC00158	ARL17B
LOC285819	LINC00634	ARL3
DDR1	BCL3	ASCC3
DPYD	SFT2D2	ASIC2
HLA-DQB1	LINC00515	ASTN1
PSORS1C1	TRIM56	ASTN2
MAD1L1	STK32B	ASXL3
HLA-DRB9	C9orf92	ATP13A4
VN1R12P	AP2A2	ATP6V1B2
ABCB9	PVRL2	ATXN1-AS1
AS3MT	SYK	B3GLCT
LINC00051	KLHL4	B4GALNT4
MPHOSPH9	MIR302F	BAIAP2
MIR2682	MYO16	BC043421
C10orf32-AS	MAP4K4	BMERB1
HCG4	BCAR3	BNC2
NOTCH4	DAB1	BRINP1
C2orf47	Intergenic	BTN3A1
C10orf32	LCORL	BUB3P1
FTSJ2	AKAP12	BUB3P1
ACTR5	RPS6KA2	C16orf78
BANK1	RHOBTB2	C6orf118
MHC	PCSK5	CABP1-DT
ERGIC3	TTC5	CACNA1E
SUMO2P1	SYN3	CAPZBP1
C2orf82	NR	CARM1P1
HLA-X	FAM47E	CCDC26
FLOT1	BANK1	CCDC68
MICC	LINC00899	CCDC73
HFE	MTSS1L	CCSER1
ESAM	CLEC3B	CDH13
TSNARE1	EFL1	CDH9
MSL2	FAM155A	CELF2
MTHFR	NTM	CELF4
SLC39A8	OR2B2	CERS6
LOC101927295	C1S	CHADL
FONG	TSPAN14	CHD6
PPP1R10	IL19	CHMP3
ZSWIM6	NCKAP5	CHORDC1
CENPM	CCDC85C	CHSY3
ATP2A2	SDR9C7	CIBAR1-DT
LINC00637	NARS2	CIR1
DMTF1	ALDH4A1	CLCC1
TRNAI28P	PKNOX2	CLP1
TCF4	FBXL7	CNNM2
IGSF9B	CACNA2D3	CNOT4
DNAJC19	ST6GAL1	CNTN5
LOC10013269	RAB20	CNTNAP5
FES	PDS5B	COP1
CACNB2	SPSB1	COP1-DT
VRK2	BDH1	CTTNBP2
MIR137	ADARB2	CTTNBP2
TRANK1	TOP1	CXCR5
AL049840.1	LIN28B	CYP7B1
PBRM1	C2orf83	CYSTM1
STAG1	TIAM2	DAGLA
NGEF	BIN1	DAND5
HIST1H2APS2	CLU	DCC
MRAP2	CD33	DCDC1
AC027228.1	CR1	DCDC2
AMBRA1	MS4A6A	DENND1A
IMMP2L	TREM2	DERA
NRGN	ABI3	DPY19L1P2
APOPT1	PLCG2	DRD2
LOC10050653	RHBDF1	DRD2
LOC646927	AHNAK	EBLN3P
ANKRD44	ATP5C1	EIF3IP1
MIR1307	BSG	ELAVL2
GLT8D1	THSD4	ELAVL4
CHRNA3	ATM	ENPP6
ALDOA	TECTA	ENSAP3
CHADL	GPR180	ENTREP2
SNX8	BAALC	EP300
SLC17A4	IRAK1BP1	ERBB4
VPS13C	GLTSCR1	ERCC4
ASPHD1	COBL	ESR1
LETM2	ODZ4	EVX2
SNAP91	TMCO4	EXTL2P1
PJA1	SLC10A2	FADS1
KDM4A	FAT3	FADS2
CSDC2	ABCA8	FAM120A
SNX19	NEK10	FAM172A
BNIP3L	SEC24B	FAM172BP
LOC10050743	GTF2H3	FBXL17
LOC100506472	RASSF5	FCF1
FANCL	COL25A1	FHIT
CNTN4	HMCN1	FOLH1B
DRD2	SCAPER	FOXP2
MLL5	DLC1	FSHR
LRRIQ3	HMGA2	FTLP18
ZNF804A	ANKRD22	FURIN
CNKSR2	MECOM	GABBR1
LRP1	AKR7A3	GALNT2
TNXB	CEP63	GIGYF2
SRPK2	SLMAP	GNAO1
SPATS2L	AOX1	GPM6A
MTMR7	CDH1	GPR89P
HLA-DOB	IQGAP2	GRIA1
HCG4P4	TIMP2	GRIK3
TAOK2	SELP	GRM5
KCNV1	FAM19A5	GRM7
DGKI	C1orf88	GTF2IRD1
HLA-DMB	IGSF23	H1-5
SATB2	SELO	H3C11
ADAMTSL3	SYNGAP1	H3C12
LINC01539	SESTD1	H3C9P
CUL3	TAS2R5	H3P27
LOC101929406	KSR2	H3P34
SYNGAP1	JPH3	H4C13
CILP2	TFEB	H4C8
PLCH2	DNAH6	HAFML
NKAPL	HDAC9	HCG20
NT5C2	SHANK2	HCG22
CHRNA2	UGT1A8	HIVEP2
LOC101927134	TBXAS1	HLA-V
LOC10050547	PTK2B	HMGB1P18
SF3B1	PICALM	HMGN4
NT5DC2	SORL1	HNRNPA1P64
GPM6A	SLC24A4	HNRNPKP3
U80770	ABCA7	HOXD13
BAG4	CASS4	HPRT1P2
TSPAN18	INPP5D	HS6ST3
TRIM8	ADAM10	HSPA8P17
FOXO3	ADAMTS4	HSPE1
LOC10013195	ALPK2	HTT
AL050132	APH1B	IFITM4P
TMTC1	CD2AP	IFT81
CACNA1I	BZRAP1-AS1	IGIP
NAB2	ECHDC3	IGLC7
CA8	EPHA1	IGSF6
DCLK3	HLA-DRB1	INSYN1
FAM5B	HS3ST1	INSYN1-AS1
ADM5	INPPD5	JKAMPP1
HCN1	SCIMP	KAT7P1
RALGPS1	SUZ12P1	KC6
RGS6	ZCWPW1	KCNB2
RERE	HLA-DRB5	KCNG2
FURIN	NME8	KDM4B
MATN1	CLNK	KIF15
PPP1R16B	CNTNAP2	KIF1A
KMT2E	HESX1	KIF2A
CLCN3	KAT8	KIRREL3-AS3
SPATA31D1	SLC25A5P3	KLC1
UBE2Q2P1	RBMXP1	KLHDC8B
LOC10013250	GOLIM4	KNOP1P3
GRAMD1B	DROSHA	KRT8P21
RPS2P34	RNF165	LARRPM
TCF20	PRDM2	LHX2
ITIH3	ANO3	LHX8
PTPRF	C14orf64	LIN28B-AS1
ATXN7	KDM3B	LINC00240
LSM1	C8orf83	LINC00243
NSUN6	OR7E116P	LINC00336
GRIA1	RSPO4	LINC00410
AKT3	CXCL14	LINC00461
ZDHHC2	PCNPP2	LINC00533
LOC10013228	MCTP2	LINC00578
MDK	MS4A2	LINC00836
AGPHD1	ANKRD31	LINC00997
KCTD13	MAPT	LINC01012
ETF1	SLC2A4A	LINC01080
ZNF536	MEF2C	LINC01088
NLGN4X	CELF1	LINC01360
CNOT1	TP53INP1	LINC01392
MIR4677	IRF6	LINC01415
EMX1	GAPDHP15	LINC01415
GRM3	PMS2CL	LINC01416
SGSM2	THSD7A	LINC01507
VPS14C	DAPL1	LINC01517
LRRC16A	PDE1A	LINC01572
SPHKAP	CPS1	LINC01613
RIMS1	CADM2	LINC01623
MIR548AI	FBXO40	LINC01812
ERCC4	LINC00290	LINC01822
ANP32E	OFCC1	LINC01876
MIR3679	PEX6	LINC01929
LOC101927839	RPL3P8	LINC01965
GABBR1	SORD	LINC02179
KCNG2	VN2R20P	LINC02205
TLE3	KCNN3	LINC02240
THOC7	SOX14	LINC02363
SLC38A8	PGBD3P4	LINC02429
ASH2L	IL21	LINC02465
ZEB2	SERINC5	LINC02479
MIR548AJ2	CDC42SE2	LINC02484
KRT8P21	RAPGEF6	LINC02571
ATPAF2	FNIP1	LINC02619
OTOL1	ACSL6	LINC02712
TOMM22P6	PFDN1	LINC02740
C17orf39	FAM20C	LINC02796
BAK1	NPVF	LINC02797
DCC	USP6NL	LINC02831
FXR1	SH2D4B	LINC02955
SRR	MKI67	LINC03000
CCDC68	MS4	LINC03003
OR2B8P	CRHR1	LINC03022
BTG1	KANSL1	LINC03051
AKAP6	WNT3	LNPK
LUZP2	C17orf28	LRFN5
BTBD18	MACROD2	LRFN5-DT
EGR1	NFIC	LSAMP
YWHAE	HBEGF	LSM8
GSDMD	BZRAP1	LTB
C4orf27	UTS2D	LTBP3
ZDHHC21	GLIS3	LUZP2
MINDY2	TREM	LY86
LIN28B	MS4A4E	LY86-AS1
PPARGC1A	ZNF224	LYPLA2P1
HIST1H3D	FAM113B	LYZL1
TBC1D5	DISC1	LZTS1
CSMD1	PCDH11X	MAD1L1
LTF	GAB2	MAK
FUT9	FRMD4A	MAPK8IP1P1
ROBO1	PRRC2C	MCFD2P1
PCGF3	FMN2	MDGA2
ELAVL2	CTNNA2	MED24
PCGEM1	LIMS2	Metazoa_SRP
ANAPC7	MOBP	METTL9
GRIN2A	AFF1	MFAP3L
BMPR1B	ANKRD55	MIR124-1HG
NAA11	PGAM5P1	MIR4255
B3GAT1	CAMK4	MIR4432HG
PCNX	DMXL1	MKLN1
MAU2	MEGF10	MOB4
TLE1	FLJ33630	MRPL46
ANKRD63	SAP30L	MS4A1
PHF2	NKAIN2	MSRA
SORCS3	PDE7B	MSRA
TRNAC32P	PLEKHG1	MSRA-DT
LOC10013084	BZW2	MTHFD1
CDIP1	CYCS	MTND2P8
C6ORF118	ELMO1	MUC22
ECM1	EXOC4	MYH15
JMJD1C	CSMD1	MYOSLID
SOX2OT	ST18	NAA11
MEF2C	NCS1	NALCN
CDC25C	PPAPDC1A	NBAS
AC005477.1	RRAS2	NCOA5
BCL11B	ARHGAP20	NEK6
PSCA	SLC4A8	NIHCOLE
ENOX1	CRADD	NKAIN2
PLCL1	ANO4	NLGN1
EFHD1	GPC6	NOL4
MSRA	CLMN	NOP56P1
LOC101928782	GABRG3	NPAP1P4
LOC100128239	LIPC	NPAS3
LOC100287010	FLJ45256	NPM1P1
HHAT	VAT1L	NR4A2
TTC7B	OSBPL7	NRDC
FOXN2	CACNA1G	NRG1
NR4A2	BCAS3	NRXN1
MMP16	LOC390956	NTRK2
C2orf56	TGM6	NTRK3-AS1
CYP26B1	PARVB	NUFIP1P1
EPC2	HECW1	OR2J2
RPL21P68	FERMT2	OR2N1P
FYN	SQSTM1	OR5AZ1P
PTGIS	TREML2	OR5BA1P
HACE1	NDUFAF6	P2RX7
MAN2A1	ADAMTS20	PALS2
THAP3	IGH	PAUPAR
CPEB1	SPPL2A	PAX5
C11orf31	TRIP4	PCDH9
TEX41	ACE	PCDHA1
SLCO6A1	SLC4A1AP	PCDHA2
SAMD13	POLN	PCDHA3
PRKD3	STK24	PCDHA4
NRBF2	MS4A	PCDHA5
PSD3	FLJ37543	PCDHA6
GULOP	MMP3	PCLO
SDCCAG8	PPP1R3B	PCLO
SPECC1	EPC2	PER1
ACADS	CCDC134	PIPOX
MIR4432	LOC100129500	PMFBP1
FAM53C	MTHFD1L	POLR1HASP
LOC10042107	PAX2	POLR2DP2
MKL1	TTLL7	PPIL1
SOX5	SASH1	PPP1R16B
BRINP2	RFC3	PRKCD
EMB	MS4A4A	PRR16
BRP44	EDEM1	PRR34
HIST1H2BJ	ALCAM	PSAT1
PHF7	VRK3	PSMD14-DT
PRKD1	SIPA1L2	PTCH1
TMEM17	WDR70	QSER1
SMIM2	API5	RAB27B
PSMD11	ACER3	RALGPS1
CASP12	PIK3C2G	RAPSN
FHIT	ARRDC4	RASGEF1A
TMX2-CTNND1	RBFOX1	RASGRP1
DLG2	NSG2	RBFOX1
C11orf87	RELN	RBMS1
TTC12	MSRA	RBMS3
PRDM14	BMPER	RERE
LOC10041978	SLC8A1-AS1	RN7SKP120
C12orf42	ADAMTS9	RN7SKP157
LEMD2	DCHS2	RN7SKP157
LOC728586	KCNV2	RN7SKP19
GALNT10	HRK	RN7SKP46
EYS	SLC28A1	RN7SL117P
PRRG2	LEMD2	RN7SL366P
DFNA5	LOC390958	RN7SL423P
FAM75D1	ZNF592	RN7SL618P
NDUFA2	CYB561	RN7SL720P
LINC01184	IL6R	RNA5SP231
ERI1	CCRL2	RNA5SP43
CDSN	CCBP2	RNA5SP459
PPP1R3A	CUGBP2	RNA5SP70
NOS1	ITGA1	RNA5SP87
TSPOAP1-AS1	PIK3R1	RNA5SP94
GIGYF2	NFIB	RNF103
C12orf65	ARID1B	RNF19A
CCDC39	C12orf75	RNU6-1103P
CLU	ITGA6	RNU6-1246P
ACD	BCHE	RNU6-334P
CNNM2	EDIL3	RNU6-636P
PCDH15	EFNA5	RNU6-745P
PCLO	PCNX	RNU6-832P
YTHDF3	MPZL1	RNU7-165P
RCBTB1	ATXN7L1	RPL10L
MGAT4C	LUZP2	RPL13P2
NIN	CDON	RPL19P11
FUT2	SUCLG2	RPL26P20
IGIP	MS4A3	RPL31P12
GSX2	FANCD2	RPL35AP4
CERS5	IQCK	RPL36P1
SLTM	ADAMTS1	RPL6P25
PP1P	MIR142	RPL7P47
LOC10013070	OARD1	RPS7P13
LOC10042066	WWOX	RPSAP2
LOC645314	LOC257396	RSPH14
RASSF1	SUCLG2P4	RSRC1
RBKS	NHLRC3	RTN1
MIR9-3	CCZ1B	SAMD3
ADGRV1	AK128216	SAMD5
HYAL3	TRPM1	SEC63P2
AP3B2	EGLN3	SEMA3E
BDH2	NEGR1	SEMA6D
CALN1	UBE2D2	SGCZ
GPD1L	PCDH7	SGIP1
NDST3	ISYNA1	SHISA9
PEPD	MIR5582	SIM1
PRKG2	FAM172BP	SLC12A5
SGCD	PHF21B	SLC15A5
CRHR1	ABCG1	SLC18A1
PPP2R5E	MTIF2	SLC25A6P2
TMEFF2	GALNT2	SLC30A9
ATXN7L3B	ADSS	SLC44A5
UFM1	DYNC1I1	SLC66A1L
LOC440704	SLCO3A1	SLC6A15
SLC9B1	CNTN1	SNRPFP3
ADAM10	C14orf37	SNX29
LOC727713	OSBPL1A	SORCS3
ODZ3	SMOX	SOX5
MAGI2	APOC1P1	SOX6
LINC01551	NCTIN2	SP4
AKAP10	CBLC	SPAG17
RENBP	KIR3DL2	SPATA16
LPHN2	LOC105373605	SPCS3
C1orf132	CEACAM16	SPPL3
PODXL	PPP1R37	SPRY2
LINC00599	TRAPPC6A	STK24
BRE	APP	STMND1
SEC16B	IL34	TAL1
LOC729217	ELK2AP	TAMALIN
FLRT2	CHRNE	TAOK3
CDH11	PRKD3	TAP2
DPP4	MRPL39	TBX15
NOSIP	TIMP3	TCF4
KCNB1	UGT1A10	TCF4
C12orf79	RIN3	TCF7L2
40422	VSTM2A	TDRD9
TENM3	RNU7-65P	TENM2
KDM4C	MEMO1P3	TERF1
SH3RF1	C5orf22	THRA
RPS15AP34	C18orf23	THSD7A
RPL7AP25	KAZN	TKT
LOC10042161	RPL36AP40	TLR4
FLJ35282	C14orf177	TMCO5A
HLA-DQA1	REEP2	TMEM106B
RTN1	IRF5P1	TMEM132B
CENTG2	DIRAS2	TMEM161B
CCT6P5	ANGPT4	TMEM97P2
LOC10050583	SLC25A48	TMF1P1
POP7	C9orf47	TMPRSS5
RPSAP28	NR2F2	TNF
LOC647275	RBBP4P4	TNXB
LRRTM4	ZNF12	TOX
PDE4B	TMEM106B	TPT1P9
FLJ10661	OR7E89P	TRAF3
LOC10028759	RPS27P10	TRIM55
ELAVL4	MGC45800	TRIM8
LOC10041951	RPL7AP36	TRMT10C
ATP5SL	IMMP2L	TSHZ2
TBX1	RPL13AP7	TTC12-DT
KCNMA1	CLDN18	TUSC1
LINC00355	KCTD8	TYW3
MIR4300	CETN4P	UHRF1
RPL29P18	KRT18P45	USP3
GABBR2	UBA52P1	VRK2
FAM184A	TAS2R62P	VWC2L
FOXP1	MGMT	WARS2
RBMS3	LRRC27A	XKR6
COX7A2P2	CDR2L	XYLT1
LOC10013031	PPIAP17	Y_RNA
CORO7-PAM16	SNAR-I	YLPM1
GGTA2P	NCR2	ZBTB20
SFXN5	HMHA1	ZCCHC7
LOC645324	MAN2A1	ZDHHC20P4
C1orf167	TSPAN13	ZDHHC21
SLAMF1	PSMA1	ZFHX4-AS1
NFKB1	SP6	ZKSCAN8
BRD1	MMP12	ZKSCAN8P1
ZZEF1	IGF1R	ZMYND8
LINC01173	MSX2	ZNF184
RPS25P4	VLDLR	ZNF204P
ZNF365	RNFT2	ZNF391
SP4	MLN	ZNF536
MIR29B2	Sec11C	ZNF638
NOL4	ALPK3	ZNF646P1
SLC7A6	TDRD10	ZNF863P
LOC10050600	CCR5	ZSCAN12
STK19	NUAK1
LOC10012910	FANCD2OS
HSPB1	TSPOAP1-AS1
GRIK3	MAF
CTDP1	FST
MIR138-1	PROSER1
KALRN	STAU2
NGF	NEGR1-IT1
POM121L2	ELL
CSF2RA	F2
PRKG1	SENP7
QPCT	APOC4
GPR98	FNTAP1
ZNF664-FAM1	NDUFAF7
YWHAG	EGFEM1P
PTBP2	PDZD2
KIT	LOXHD1
LOC10028701	MUC15
HIP1R	EGR1
TENM2	FAM92A1
DDC	PSMF1
BCL9	IL9
RPL21P40	S1PR3
DNAJA1P4	GEMC1
CASC6	GRIN3B
FEZ1	SPON1
HMGB3P24	MRPL10
CXXC4	MIR1275
AC005609.1	SHE
LINC00701	CCR2
CNTN2	WTAPP1
LOC646794	PVR
RUNDC2A	SSBP4
RELN	CKAP5
C1orf87	APOC2
LOC643232	RPL7P19
CWC22	SHC3
NCOA4P1	MS4A6E
EEPD1	OSTNIL1-RAP
SIPA1L2	UBE2Q1
LOC10050716	LTF
CLSTN3	MMP13
SYT13	EXOC3L2
CCDC60	ETF1
C9orf5	CCDC50
CDH13	ADAR
STT3A	CCR3
ADAMTS6	DCUN1D5
LINGO2	HSPA9
DSG1-AS1	SNORD63
GNAT1	APOC4-APOC2
LOC10042043	CLPTM1
MECR	PAX5 - RPL32P21
PLAA	APOC1 - APOC1P1
ST3Gal1	RPL21P41 - KBTBD8
LGALS17A	LNC-LBCS
FZD1	Y_RNA - LINC01689
AGBL1	APOE - APOC1
MKNK1	MRM1 - LHX1-DT
PCAT5	LINC02370 - LINC02414
UBE2G1	BCAM - NECTIN2
PHACTR3	TMCC1-DT - TRH
PRMT7	SRCIN1 - EPOP
ACSM1	RNA5SP489 - RPL13AP7
EXOC2	SMIM45
PCDH20	MIR155HG - MRPL39
CXCL12	TRIM56 - SERPINE1
BMP5	CCDC171 - LINC03041
GS1-279B7.1	NECTIN2
SLC25A5P2	TOMM40 - APOE
LOC401134	DIRAS2 - OR7E109P
NRXN3	DACH2 - KLHL4
PPFIA2	RNU6-408P - MIR302F
NKAIN2	CYRIA - LINC01866
PRRC2A	MIR4675 - NEBL
COL25A1	GRPEL2P2 - BLOC1S2P1
RORA	AGT
PAPD5	RPL21P119 - LINC02177
LMBR1	ERBB4
MSI2	FAM163A
SPAG16	BLOC1S4 - KIAA0232
COL21A1	LINC02645 - PFKP-DT
KIAA1217	MIR633 - TRMT112P3
PPP2R2B	LINC01712
ARHGAP31	LINC02815
ARNTL	RNU6-546P - LINC01876
RAF1P1	NIT2
HLA-DRB1	AARS2 - SPATS1
LIPC	LINC02836 - RN7SKP211
COX5BP1	ARHGAP16P - LINC02307
PPP3R1	SLC14A2
CNTNAP5	NRXN1
FBXO11	LINC01122 - LINC01793
NRP1	BMP1
FAM201A	NKX2-6 - STC1
LINC02188	PKMP4 - HNF4G
DSCAM	MTND2P9 - RPS19P6
RPL35P8	EEF1A1P49 - SNRPGP16
CCDC182	LINC01081 - LINC00917
KIF26B	LINC01960 - RPSAP24
RPL10P13	MED12L
ANK3	FTH1P5 - PKHD1
NLRC5	RN7SL643P - HTR1E
ETS2	CDHR3 - SYPL1
RYR3	DVL2
ZFYVE28	MGME1
NDUFS4	WNT7B - LINC00899
BORCS8-MEF2B	MTSS2
ASAH2	CLEC3B - CDCP1
MSTN	NALF1 - LIG4
LOC389602	OR2B2 - OR2W6P
ZNF323	NCKAP5 - RN7SKP93
CACNA1C-AS4	LINC03069 - TXNL1
MIR4655	SIGLEC22P - CD33
MIR4472-1	ATP5F1C
C2orf69	C11orf65
INA	RPS19P6 - RPS20P25
ARL6IP4	TMEM94
MSANTD2	PLCL1
PCCB	HMG20A - LINGO1
LINC00634	RPL15P15 - LINC02151
PPP1R13B	LINC00626 - SUMO1P2
KIAA1324L	LINC00624
LOC101927273	PCSK6
ARHGAP1	RAD23BP2 - SEMA3A
ANKRD44-IT1	NPEPPSP1 - MRPL45
SFXN2	CDH7 - PRPF19P1
GLYCTK	RN7SKP102 - CNTNAP5-DT
EP300	RNU6-1213P - Y_RNA
NUDT1	CCDC112 - CTNNA1P1
LRRN3	SESTD1 - RAD52P1
DOC2A	FAM240B
MED8	RNY4P18 - MIR7702
PRSS16	BICRA
MGAT3	CICP17 - ROBO2P1
MIR4301	SEC24B-AS1
MYO1A	LINC02552 - CASP12
CHRNA5	TENM4
VPS37A	NACAP6 - LINC02150
NCK1	METTL21EP - SLC10A2
CSPG4P11	DYSF - RPS20P10
GATAD2A	C9orf152 - TXN
CHRM4	GRIK2 - R3HDM2P2
PTK2B	RDX
DDHD2	KCTD9P6 - RNA5SP261
PPP2R2A	STEAP3-AS1
ZNF259P1	ERO1A - PSMC6
BOLL	RNU7-188P - SEM1
GOLGA6L4	MIR4431 - ASB3
STAT6	STK31 - RNA5SP228
MLH1	PTPRS - ZNRF4
BCL2L12	PPP1R3B-DT
GNL3	ZNF462 - RAD23B
SLC45A1	LINC02986 - RPSAP47
KMT2E-AS1	LINC02421 - LINC01479
PTN	LINC02063 - LINC02114
NEK1	NAALADL2
C3orf49	HMGA2-AS1
WHSC1L1	ADGRL2
NDRG4	CCZ1B - OR7E39P
PSMA4	MCPH1-AS1
PTPRU	CPM - CPSF6
SMG6	CFAP74
APH1A	CTNND2 - RNU6-679P
CA14	UNC93B4
HSPA9	RASSF8
ALPK3	RBMS3
MROH6	TAFA5
PUS7	LINC02388 - LRIG3
othergenes	PPP5D1P
CYP2D6	KLHL36 - USP10
PBX4	CIMAP3
PAK6	SELENOO
CORO7	KRAS - RNU4-67P
MRPS21	CDCA7L - RAPGEF5
CTNNA1	TRPC6P8 - ZP3P2
CEBPZ	BNIP3P13 - ZNF90
MED19	ATP6V0E2 - ACTR3C
DCAF6	CTD-2194D22.4 - Y_RNA
SLC17A1	RBMX2P4 - ETV1
MPP6	CSNK2A1 - TCF15
PCDHA1	SUMO2P6 - HIGD1AP3
FAM85B	PRANCR
NPAS3	LINC01756 - LINC01648
KCNJ13	MEI4 - IRAK1BP1
CEP170	SLC24A2 - MLLT3
OGFOD2	RN7SKP120 - TUSC1
EPHX2	RNA5SP169 - LINC02273
SLC38A7	RNU6-1060P - SPTLC1P2
C16orf86	MDGA2 - MIR548Y
DRG2	OSER1-DT - GDAP1L1
GID4	ZNF438 - LINC02664
POLG	AQP4-AS1
PHF3	RNU4-69P - RPL23AP44
CENPE	HS3ST3B1 - RPS18P12
ZNF860	MIR924HG
CEBPG	ADAM3A - ADAM18
DPYD-AS1	KIFC3 - CNGB1
NMUR2	LINC02103 - RNU6-909P
CCDC144CP	MS4A2 - LINC02705
MECP2	RNU6-560P - LINC02695
C5orf43	ZNF652-AS1 - PHB1
CD46	BIN1 - NIFKP9
MIR124-1	B3GNTL1P2 - CD2AP-DT
GPN1	USP6NL-AS1 - ECHDC3
SLC4A10	EPHA1-AS1
PRR12	HS3ST1 - LINC02360
SOWAHC	ZNF594-DT
ITIH4	DSG2
CEACAM21	PILRA
GNB1L	HLA-DRB1 - HLA-DQA1
LINC01052	GPR141
SH3BP4	LINC02498 - MIR572
CTD	IL17RD - HESX1
IL3RA	PICALM - RNU6-560P
has-mir-137	ZFP3
GRB10	LRFN2 - UNC5CL
El24	PMS2P1
CD14	CLASRP
LINC01748	GEMIN7-AS1
ADAM	MARK4
MIR873	BLOC1S3
SRSF4	CEACAM16-AS1
CLC	CBLC - BCAM
KCN1	CHRNA2
ANKRD30A	LINC02705 - MS4A6A
SLC7A6OS	ADAM10 - SNORD3P1
9648	CYB561 - PPIAP55
LINC01350	CEACAM20
BAG6	CEACAM22P
NOM1	ZNF232-AS1
WDR1	APOC1P1 - APOC4
PARD3	CLPTM1 - RELB
BUCS1	LINC01445 - VSTM2A
CNTNAP3	RBMXP1 - RNU7-65P
LINC02181	C5orf22 - RNU6-363P
LINC02105	ARK2C
MEF2B	RN7SL714P - LINC02914
SGMS1	RPL7P19 - ETF1
C2orf88	TRIQK
LOC285889	LINC01508
ZSCAN23	PCNPP2 - S1PR3
CACNA1C-IT3	LINC02852 - LETR1
MIR137HG	ARL17B
C10orf32-ASMT	MEF2C-AS1
FTCDNL1	GAPDHP15 - RBBP4P4
SLC32A1	SNORA72 - EFR3A
TYW5	THSD7A - TMEM106B
MIR33A	CPS1 - RPS27P10
XRCC3	LINC00290 - LINC02500
TMEM243	OFCC1 - RPL7AP36
LOC100505474	RPL3P8 - IMMP2L
MAN2A2	LINC01684
BAG5	HSPA8P9 - CLDN18
ATG13	RN7SL691P - RN7SL193P
ST13P13	IL21-AS1
C16orf92	SERINC5 - KRT18P45
EP300-AS1	MEIKIN
FAM57B	PFDN1 - HBEGF
MCHR1	FAM157D - LINC03015
TAB1	TSEN15P3 - LINC03007
CHRNB4	LINC01163 - LINC02667
LOC101928882	LINC02210-CRHR1
NCK1-AS1	HID1-AS1 - CDR2L
CSPG4P5	MACROD2 - PPIAP17
HAPLN4	GMNC - OSTN
DGKZ	NCR2 - FOXP4-AS1
SDAD1P1	ZNF225-AS1
COQ10B	PCED1B - PPIAP45
ZSCAN2	LRAT
L3MBTL2	FRMD4A; FRMD4A; FRMD4A
TMEM194A	SLC12A2-DT
CPT1C	PLPP4
ITIH1	ALDH1A2
LINC01004	TNRC6A
PSMD6	PPIAP59
SETD6	LINC01031 - RPL23AP22
C1orf51	TREM2 - TREML2
SNORD91A	ADAMTS20 - EEF1A1P17
OTUD7B	IGHV2-70 - IGHV3-71
SNORD63	MTCYBP27 - RNU6-976P
DNM1P41	HAS2-AS1
CLP1	PROX1-AS1
NAPRT1	RN7SKP168 - ZFYVE9P2
FAM109B	TBX3-AS1 - UBA52P7
PLCB2	ATP8A2P3
DNAJA3	CLU - SCARA3
RPRD2	CLU; CLU; CLU
YPEL4	CR1; CR1
BTN3A2	C5orf64
MUSTN1	MMP3 - MMP12
PCDHA10	PPP1R2P5 - LINC01789
FAM86B3P	RPS3AP17 - PCDH7
GTF2H4	EPC2 - RNU2-9P
RILPL2	EDAR - Metazoa_SRP
CENPT	LINC01725
LRRC48	SAMD5 - SASH1
RLBP1	RFC3 - VDAC1P12
PTP4A1	SLC52A1 - ZFP3-DT
CISD2	FAM171A2 - RPL7L1P5
ARHGAP4	FUT2 - MAMSTR
CR1L	LILRA5 - VN1R104P
MIR597	AGRN
MIR4263	LINC02946 - NCK2
LOC100128600	TNIP1
PKNOX2	HAVCR2
DND1	OPLAH
MOBKL2C	LINC01553 - ANK3
C10orf32-AS3MT	SPI1
PITPNM2	GNPNAT1 - FERMT2
CDK2AP1	SNORD3P1 - MINDY2-DT
VSIG2	RN7SL553P - MTARC2P1
TMEM22	EZRP1 - ALCAM
37865	RN7SL299P - SIPA1L2
ZFYVE21	HNRNPKP3
TP53TG1	TSKU - ACER3
CKB	LINC02254
PCGF6	RBFOX1 - LINC02152
NEK4	LINC03022
INO80E	MTARC2P1 - GRM7-AS3
ST3GAL3	ADAMTS9-AS2
POLR3H	PUM3
NDUFA4L2	MAPRE1P2 - RPL31P31
HYKK	MLN - LINC01016
SOX2-OT	LINC02181 - C16orf95
EFTUD1P1	OACYLP - SEC11C
HSPD1	DYNLL1P4 - RBM19
RANGAP1	CYP8B1
IRF3	CELF2
PPP2R3A	RPS17P11 - MFSD4BP1
PSMD6-AS2	RPL3P11 - ATP5PDP3
TSR1	H3P28 - ARID1B
C1orf54	CASC18
SNORD91B	SSBL6P - LINC01326
FGFR1	EDIL3-DT - PPIAP79
PLEKHO1	RN7SL782P - RN7SKP122
CTNND1	LINC02098 - ETS1
EEF1D	PCNX1
NAGA	BMP2 - LINC01428
GMIP	RN7SKP27 - LINC02923
NMRAL1	ICOS - DSTNP5
SULT6B1	LMOD3 - FRMD4B
ZDHHC5	MAILR
BTN2A2	SLC25A6P5 - LINC01505
PCDHA13	PCNX1 - SIPA1L1-AS1
FAM86C1	NDUFA12
MIR4304	RN7SKP207 - HPRT1P2
CTRL	MS4A3 - MS4A2
MIR33B	CYYR1 - ADAMTS1
KRT8P46	RNA5SP431 - MAF
USP32P3	RPL13AP13 - FST
MRPL33	LINC02109
RCN3	NHLRC3 - NXT1P1
HARS	OR7E136P - OR7E59P
CYP17A1	RDH10-AS1 - STAU2-AS1
SETD8	LINC02353 - MAPRE1P2
LOC100507091	RUNX3 - MIR4425
SHISA8	ADSS2
ASPG	NCK2 - ECRG4
KLC1	LNX1
CKAP5	HLA-DRB9 - HLA-DRB5
PDCD11	NEBL
MIR1281	LINC00520 - PELI2
RPS19BP1	LINC01254 - APCDD1
NXPH4	ZNF57 - ZNF77
IREB2	GALNT7-DT
NCAN	LINC02064
MIR6843	SPRY4-AS1
HSPE1	RCL1 - HNRNPA1P41
MIR5088	LINC01588
SLC35G2	ARMH4
SNORA46	LINC00470 - AIDAP3
VPS45	SUDS3 - LINC02460
RAI1	CEACAM16-AS1 - BCL3
GOLGA2P7	CZIB-DT
TIGD5	SCN2A
NDUFA6	UBE2U - RNU7-62P
LPAR2	CWC22 - SCHLAP1
BTN3A1	LINC01765 - NGF-AS1
PCDHA2	RN7SL44P - S100A6
DDX28	MIR181A1HG - LINC01222
MYO15A	FARSB
MIR6777	LINC02817 - DUSP10
LRRC37A15P	SNRK
TNKS	LSAMP - RNU6-1200P
RRAS	GPR156
HARS2	CCDC85A - PPIAP63
WBP1L	LINC02934
SREBF2	LINC01208 - MTND5P15
C14orf2	ANAPC1
CREB3L1	RNU2-40P - IFITM3P1
SFMBT1	ENOPH1
GDPD3	LINC02503 - CXXC4
MIR6889	LINC02233 - LINC02477
MAPK3	RNA5SP173 - NDUFB5P1
XPNPEP3	MIR3945HG - LINC01093
R3HDM2	F11-AS1
NDUFA13	SLC6A3
MARS2	PDE4D
PRMT1	TMEM174 - LINC02230
THOC7-AS1	LIX1-AS1 - LINC01340
SNORA76A	PJA2 - KRT18P42
SREBF1	LINC02208
MIR130A	TNFAIP8
PYCRL	LINC02039 - GRAMD2B
SERPING1	PITX1-AS1
MIR640	COL23A1
GFRA3	DEK
HIST1H2AG	MIR4462 - MDGA1
PCDHA3	RNA5SP208 - RNU6-280P
DPEP2	TENT5A
NHEDC1	MTCYBP36 - CYCSP17
SLC4A1AP	RNU1-18P - HSF2
SCAF1	PER3P1 - U3
IK	NPY - RNU6-1103P
MIR8072	OSBPL3 - CYCS
TNFRSF13C	AMPH
RD3L	DDX43P3 - HGF
TRMT61A	ABCB1
HSPE1-MOB4	GNG11 - BET1
TAF5	NAPEPLD
SPCS1	DPY19L2P2
HIRIP3	DGKI
SEZ6L2	RPL36AP28 - XRCC2
ZC3H7B	MSR1
SHMT2	STC1 - RNU1-148P
PPAPDC1B	UNC5D
TOM1L2	UNC5D - MTCYBP19
GOLGA6L5P	RNU6-533P - RPL23P10
TMX2	RPL23P10 - RNA5SP264
DNAH1	ANXA13
PCDHA4	PVT1
SBNO1	KCNQ3
DPEP3	R3HDM1 - UBXN4
SMCR5	RPSAP20 - LINC01767
SUPT7L	LINC01748
TDRD9	CDCA7 - JPT1P1
F2	Y_RNA - NRBF2P3
STAC3	CRYGD - CRYGC
SUGP1	PSMB3P2 - IGFBP2
RFTN2	ST13P19 - HHAT
NISCH	LMCD1-AS1
STAR	ENAH
LINC00933	KRT18P32 - MIPEPP2
SMDT1	MIPEPP2 - CHRM3
KDM3B	RNU6-649P - LINC01248
ZNF184	LINC03051 - IGSF11
BAP1	RNU6-505P - RPL21P71
PCDHA5	LINC02245
DUS2L	OTOL1 - TOMM22P6
DUS2	RPL27AP4 - ILRUNP1
RPEL1	RN7SL493P - ATF7IP2
CYP2D7P	PRKCB
HARBI1	RPS15AP34 - LINC02165
MOB4	HDAC5
TMEM219	LINC01982
TM6SF2	SLC25A19 - GRB2
LOC440300	TBC1D16
REEP2	CTIF
ALAS1	LINC01924 - LINC01916
PCDHA7	EDN3 - PIEZO1P1
EDC4	PPIAP1 - NCAM2
YPEL3	KRTAP7-1 - KRTAP11-1
TAC3	ANAPC1P3 - MIR4771-1
TSSK6	USP40 - UGT1A12P
LOC642423	MBOAT1
YJEFN3	PTK7
SLC17A3	MAP3K7 - MIR4643
PCDHA8	TRDN
ENKD1	LINC00587 - CYLC2
LOC388906	RPS27P18 - TEX36-AS1
MIR3160-1	PATE3
USMG5	SLC2A14
PPP4C	LINC00477
SMIM4	RN7SL766P - LINC00424
LOC102724034	RN7SL700P - SUCLA2
PCDHAC2	LINC02335
ESRP2	DNAJA1P1 - HMGN2P39
LOC101929829	PCDH9
MIR3160-2	MTCL1P1 - LINC00348
LOC103171574	DPPA3P3 - LINC00564
WBP2NL	COL4A2
ALDOAP1	GZMB - STXBP6
PCDHB3	GNG2
GFOD2	FUT8
MIR4688	FUT8 - NCOA4P1
STAB1	GCNT3
NMB	ATOSA
C3orf78	PRTG
SRA1	ADAMTS7P3
LCAT	LINC01579
ZNF408	VLDLR-AS1
CALHM1	PUM3 - GPS2P1
TBX6	PLIN2
TMEM110	CDKN2A
SCAND2P	TRMO
TMCO6	GABBR2
NFATC3	ABCA1
LOC100131303	KIF12 - COL27A1
PCDHA6	SLC2A8
NDUFA6-AS1	LINC02668
CALHM2	PRKG1
TMEM110-MUSTN1	MRPS35P3 - IPMK
SEC11A	PDCD4
MIR135A1	LINC02667 - MGMT
WDR55	LINC02760 - DNAAF11P1
NRN1L	RNA5SP349 - SNORD39
MIR6773	RNF214
UBE2Q2L	DSCAML1
MIRLET7G	FEZ1
ZMAT2	KRT5
NUTF2	KRR1
CALHM3	TMEM132D
PARD6A	ATP8A2
PCDHA9	TMCO5B - RYR3-DT
WDR73	RNU6-745P - LINC02205
PLA2G15	POLG
ZNF592	RNU1-23P - GAPDHP53
WDR82	MRC1
PSKH1	CMIP - PLCG2
TWF2	RN7SL354P - SPPL2A
PSMB10	APP-DT - CYYR1-AS1
TNNC1	USP50
RANBP10	PLEC
SLC12A4	IGHEP1 - IGHG1
TLR9	C17orf107
RLTPR	MROH1
THAP11	SPATC1
TSNAXIP1	SORCS1 - RNA5SP326
SEMA3G	CHD2
RFT1	LINC03070 - NLGN4X
PPM1M	MID1
LINC03003	SLC9A7
HNRNPA1P1 - CD83P1	ZNF280C
TNRC18P3 - SLC29A4P1	MAP7D3
OR2J2 - OR2J4P	ADGRG4
SNX13	MTM1
ZSCAN31	TACR3
H4C12 - H2AC15	CDKL1
VN1R11P - RNU2-62P	NSF
AGMO	USH2A
BSNDP4 - RNU6-417P	CYLC2
RN7SL35P - CD36	CAMSAP1
H3C9P - BTN3A2	NOTCH1
MIR4283-2 - CICP24	MAPT-AS1
LRGUK - SLC35B4	ERN1
H2AC14	MKLN1
ACTR3B - LINC01287	CFAP418-AS1
DPY19L4P2 - CNTNAP2	FAM135B
BORCS7-ASMT	ROR2
PMS2P12	SETX
TES	MIX23P2 - PRKG1
LINC02571 - HLA-B	ATG2A
BTN1A1P1	TPCN2
LINC02889 - SNX13	ANO1
GALNT17	BORCS5
PTGES3P4 - BORCS7	RPS12P24 - LINC01048
DPP6	DLEU1
DPP6 - PAXIP1-AS2	PSMA6P4 - RPL7AP61
LINC01360 - LINC02238	RPS8P3 - DCC
LINC03009	KDM4B
LINC00240	SLC2A10 - RN7SKP33
RNU6-133P - CNKSR2	LINC01429
SNORC	TSHZ2
FERD3L - POLR1F	LINC00686 - NTSR1
SLC13A1	LINC02772
TFAMP1 - ELFN1	IRF2BP2 - LINC00184
DRD2 - TMPRSS5	NBAS
NFU1P2 - LINC01776	RPL23AP28 - PAX3
GRM3-AS1	COL6A3 - MLPH
FTCDNL1 - RN7SL717P	RPS18P6 - MTHFD2P1
ADCY1	OR5K1 - OR5K2
HLA-DMB - HLA-DMA	SCFD2
PTPRF - KDM4A	ZSWIM5P3 - LINC02466
MAU2 - GATAD2A	FSTL5
RBMX2P4 - ETV1	LINC02512 - HSP90AA6P
LINC01756 - LINC01648	SORBS2
GPR141	RPS23P5 - NENFP3
H2BC4	NENFP3 - RPL29P13
PLCL1 - RNU7-147P	SNRPCP2 - IQGAP2
CARMIL1	SEMA6A-AS2 - RPS17P2
MIPEPP2 - CHRM3	ARSI
C10orf95-AS1	LINC02227 - EBF1
BANK1 - SLC39A8	RNF130
RN7SKP19 - LINC01360	TMEM244 - L3MBTL3
TMEM229A - SSU72L6	MAD1L1
LINC02057	CCDC91 - FAR2
MRPS30 - HCN1	LINC01776 - SNX7
MAIP1	Y_RNA - C1GALT1
PPP1R13B-DT	GRIK3
IGSF9B - LINC02730	ANTXR1 - GFPT1
LINC02057 - ZSWIM6	HMGN1P19 - EPS15P1
CCDC68 - LINC01929	MOB3B
KLF6	TRPC6
LINC01470	SNORD39 - C11orf87
RNU6-408P - MIR302F	GPC5
OPCML	CLYBL - ZIC5
BRINP2 - LINC01645	GALR1 - BDP1P
RORA - LINC02349	MC3R - FAM210B
LINC00933 - ZSCAN2-AS1	PPIL2
BCAS2P3 - RBM26	LINC02782 - MIR4689
OTOL1 - TOMM22P6	SLC38A1
HSPD1P6 - LINC02033	KLF16
COA8	SIGLEC11
RNU6-1029P - COQ10B	RNU6-1307P - LILRB2
TMF1P1 - ERCC4	RBCK1
H2BP5	SLC2A4RG
RPL6P5 - METAP2P1	DEDD - UFC1
B3GAT1-DT	QKILA
RPL3P8 - IMMP2L	ATP8B4
SF3B1 - RNU6-1029P	TNFSF12-TNFSF13
LINC02551	ARHGAP45
LINC01415 - LINC01416	IGHG1 - IGHG3
SEPTIN3	IGHV3-64 - IGHV3-65
EFNB1 - PJA1	SNX1
PRSS16 - POM121L2	CTSH
EIF2S2P7 - ACTG1P22	DOC2A
LINC03069	BCKDK
LINC01470 - GRIA1	LINC00917 - FENDRR
NXPH4 - SHMT2	FAM157C
MAIP1 - SPATS2L	WDR81
LINC01239	MYO15A
CUL9	GRN
EPN2	SORT1
TRPV6 - TRPV5	ADAM17 - YWHAQ
CTTNBP2	GPR141 - NME8
RPSAP48 - NDUFB9P3	NCK2
B3GAT1-DT - LINC02706	CTSB
PDE1C	SHARPIN
PALS2	BLNK
FRMD5	PLEKHA1
ETF1 - HSPA9	TPCN1
TRIM8 - ARL3	NUDT12 - NIHCOLE
MEF2C-AS1	TRANK1
SNX19 - RN7SL167P	SLC26A1
ITIH3 - ITIH4	RHOH
PES1	UMAD1
HYDINP1 - LINC02050	JAZF1
MIR124-2HG	SEC61G-DT - EGFR
CYP7B1	ICA1L
RNA5SP267 - SLC2A13P1	ABCF3 - VWA5B2
GPR89P - RSL24D1P1	PSMC3 - RAPSN
CAPZA1P4 - PLXNA4	LINC02059 - MIR4280HG
KANSL1	RASGEF1C
ZBTB34 - RALGPS1	HDAC2-AS2
SLC66A2	ICA1
HYAL1 - HYAL2	PRSS36
GUSBP2	REXO1
LINC02686 - Y_RNA	WDR12
LINC03092	MME
EFL1P1 - DNM1P41	IDUA
KCTD13-DT	ANKH
METTL15 - LINC02758	HLA-DQA1
ACTR5 - PPP1R16B	CNN2 - ABCA7
RN7SKP270 - PTBP2	RPLP0P5 - RPL7AP81
Metazoa_SRP - SLC32A1	SYNPR
LINC01360	BFSP2
PLCL2	LEF1-AS1
DDX10P2 - MTCO3P40	TENM2
HCN1 - EMB	SDK1
LINC02797	MIOS-DT
FANCI	LINC02838 - GDI2P1
VTRNA1-3 - PCDHA1	DENND3
SPATA2P1 - RN7SKP6	Y_RNA - MIR378C
TCF4 - LINC01415	CST6 - CATSPER1
ANLN - AOAH	MTMR2 - RPL32P25
IL1RAPL1	NTF3
RN7SKP93 - MGAT5	PRICKLE1
CACNA1D	NOC4L - LINC02361
GLB1L2	IPPKP1 - SNORD27
RPL7P19 - ETF1	DIO2-AS1
RN7SL366P - C6orf118	CDIPTOSP - SEZ6L2
GPM6A-DT	NXN
WSCD2	MYO1C
U3 - LINC02531	MBD3
PCGEM1 - SLC44A3P1	PHF14 - NPM1P11
TMCC3 - KRT19P2	LINC02301 - RNU7-51P
MAPRE1P2 - RPL31P31	MIR4280HG
FANCA	TUBG2
MLXIP	DSCAM
TRARG1 - YWHAE	ARFGEF2
TRPC4	LINC02699 - ANO3
SPHKAP - SNF8P1	NDUFB5P1 - LINC00290
RIMS1 - KCNQ5-DT	RNU6ATAC15P - RPSAP29
RNU11-5P - PRKD1	ATP2C1
MIR124-2HG - BHLHE22-AS1	FMN1
RPL6P31 - VPS45	TUSC3
LRRC4B	ITGB1BP1
AGO1	RNU6-1325P - LINC02496
KRT18P50 - FUT9	ZKSCAN4 - NKAPL
PCNX1	TRIB1 - TRIB1AL
RPS8P3 - DCC	IGHV3-65 - IGHVII-65-1
NMB - SEC11A	RNF125 - RNF138
TBPL1	RNA5SP62 - RNA5SP63
NEGR1	MRPL50P1 - RPL21P36
CYB561 - PPIAP55	LINC01812 - FBXL12P1
BBX	AGAP1
RNU6-745P - LINC02205	UBE2QL1 - LINC01018
SLC38A8 - MBTPS1	HIGD1AP18 - PKIA-AS1
NSD3	CENPP
GBA3 - RFPL4AP3	TMOD1
DOCK3	MIR3689F - FCN2
RPS19BP1 - CACNA1I	LINC00333 - LINC00375
ANKRD45	PNP - RNASE10
ZNF823	POLR2E - GPX4
KLHL2	KCNE2
LINC01965 - AHCYP3	MPDZ
PGAM1P1 - PLK2	SRGAP3
MFAP3	IYD - PLEKHG1
FRY	C12orf42-AS1
MRTFA	LINC01250
RPL36AP20 - LINC01470	CNTNAP4
PPP1CC - RPL29P25	C12orf42
RNU6-740P - LINC00502	SNRPEP5 - ID2-AS1
POLG-DT - MIR9-3HG	TANC2
ABCB1	RLIG1P3 - RPSAP74
LINC02920	TEX41
GGNBP1	UNC5C-AS1
HNF1A-AS1	OVOL2
LINC02326	SCARB2
ZSCAN16-AS1	BAALC-AS1
LINC02823 - LINC02404	CEP295NL
OTUD7B - RPL6P31	MIR142HG
BCL11A - RN7SL361P	TSNAX-DISC1
EGR2 - RNU6-543P	PDE7B-AS1
NFIB - CDCA4P1	LIPC-AS1
Metazoa_SRP - LINC02123	LINC01567
LINC00558	RNF6
RPL7P9 - RN7SKP270	RERGL
EFNA5	ACKR2
NEBL	LINC02576
RNA5SP234 - GNAI1	ADARB2-AS1
ASIC1	GLIPR1
H1-12P	SPPL2C
SPA17 - NRGN	SETD7
AXDND1	TNFSF13
LINC02165 - PPIAP48	UNC5CL
SLC32A1 - ACTR5	HS3ST5
SELENOH	SYNPR-AS1
RNF111	DIO2
DLX1 - DLX2
GRM1
P2RX7 - P2RX4
LINC02730
RELA-DT
ARHGAP40
TRPV4
CTDP1 - KCNG2
CACNA2D2
LINC02264 - NDST3
RN7SL167P - NTM
RNA5SP30 - LINC02338
EIF5 - HMGB3P26
PTN - DGKI
CCDC62 - HIP1R
PPM1M - WDR82
PTPRD
LINC01088
LINC01830
SMPD3
SNCA
STRN
CACNA2D2 - C3orf18
EXOC4
LINC02406
CXXC5 - RNU6-236P
MTCYBP27 - RNU6-976P
PPARGC1A - DHX15
LINC01725
MST1R - MON1A
OR8A1 - OR8Q1P
FAM120A - PHF2
RNU6-546P - LINC01876
KLF10 - ADI1P2
ZNF281 - KIF14
THAP8
NRBP2 - EPPK1
GJD2-DT
ADAM10 - SNORD3P1
HMGB3P24 - RNF38
LINC01884
FALEC - ADAMTSL4-AS2
CNOT1 - SLC38A7
DPH2 - ATP6V0B
KRT18P42 - MAN2A1-DT
SUFU
JRK
PAK5
URAHP
DOCK6 - TSPAN16
ZIM2-AS1
EFHD1 - GIGYF2
NDUFB9P2 - CAPZA1P4
LINC02621 - RN7SL591P
VN1R18P - RN7SKP224
OLA1
ATXN7L3B - KCNC2
MAP7D1
RNA5SP94 - MIR4432HG
AGBL4
RPL6P22 - RPL10AP3
DRC3
CMAHP - KATNBL1P5
RPS15AP34 - LINC02165
KIF21B
LINC00571
RPL21P68 - CARMIL1
SYT13 - LINC02696
DNAJC11
TBC1D15
LINC00320
SPATA19 - IGSF9B
OSBPL10
NXPH1
REEP2 - EGR1
ACADS - SPPL3
MRTFA - GAPDHP37
LINC02566 - SOX5
EMB - PARP8
MIR3143 - RPL10P2
MPC2
ACTG1P22 - VRK2
ZNF804A - ELF2P4
SGCE
LINC01899 - CBLN2
RLIG1P3 - RPSAP74
TDRD9 - ASPG
ZFP57 - ZDHHC20P1
AGAP1
UTRN
RN7SL18P - TMEM17
SMIM2-AS1
ZNF207 - PSMD11
LINC02552 - CASP12
ARSA - Y_RNA
ARRDC3-AS1 - PCBP2P3
AIG1
METTL15
SNORD116 - LINC00598
AP3D1
STUM
GCFC2 - SUCLA2P2
POC1B-AS1
TXNRD1
NALCN
IGKV1OR2-3 - GPAT2P2
CRTC2
MYO19
BCL11A
C11orf87 - LINC02715
C12orf42-AS1 - C12orf42
CCDC192
GSDME
DDR1 - GTF2H4
SMIM30 - PPP1R3A
OPRD1
ROBO2
MTRFR
Y_RNA - RPL21P45
POP7 - EPO
LINC01289
RCBTB1 - ARL11
RPL23AP68 - CYCSP30
IGIP - CYSTM1
CERS5 - LIMA1
SLC9B2
KIAA1549
ALMS1
LINC02882
LINC02549 - ADGRB3-DT
RN7SKP190 - CDH13
GMEB1
TLCD4-RWDD3
ORC5
ANKS1B
ELOCP27 - PPIAP14
KLF12
RORB - TRPM6
LINC02053
OR8B8
RPL21P46 - SLIT2
RNU6-206P - FMC1
TACC2
RBFOX1
DNAJC17P1 - SEC61GP1
RBMS3 - U3
MAPKAPK3
IGF2BP3
GNG7
CACNA1I - ENTHD1
TNFRSF13C - CENPM
LINC01378 - LINC02264
MCL1
LPP
SAMD3
STK31 - RNA5SP228
LIMA1
GTF2A1
LINC02210-CRHR1
PANK1
AMD1P4 - HIVEP1
LINC02628 - LINC00838
FRMPD4
TNKS - MIR124-1HG
POT1-AS1 - GRM8
NCAM1
LINC01814
TTYH3
LGSN - EEF1B2P5
CXXC4-AS1
LINC02929
SP7
TRAF3IP2-AS1
MIGA2
TBL1XR1
NWD2
LINC01720 - HNRNPA1P46
DPYD-IT1
MROH6 - NAPRT
ADGRL2 - LINC01362
AGO4
Y_RNA - NRBF2P3
ANKRD45 - KLHL20
LINC01877
LINC02267 - COX7A2P2
RP1
MIR29B2CHG
SNF8P1 - LINC01807
PPDPF - PTK6
LINC00678
CBX3P6 - RNU6-1001P
LINC00624
PCNX1 - SIPA1L1-AS1
DNAJC11 - LINC01672
MLF2
MED27
INPP4B - USP38-DT
LINC01741 - SEC16B
PALS2 - GSDME
RFLNA
U3 - LARS2
TMEM243 - TP53TG1
RAB3IL1
TENM4 - RNU6-544P
SLC4A10 - DPP4
SH3RF3 - SEPTIN10
LRP4
ATP8A1
SHISA9
EFCAB6
RPAIN
MAP9-AS1
RPTOR
TLCD4
NT5ELP
CTDSPL
TFAP2B - RPS17P5
TTBK1
PDP2 - CDH16
LINC01650 - LINC01761
SH3RF1 - NEK1
MRPS5P3 - SELENOTP2
SUCLA2P2 - PNPP1
LINC02033 - TRANK1
MEF2C-AS2
FAM3A
COX6A1P4 - MTND4LP18
THRB
ERBB4
PINX1-DT - XKR6
SIAE
LINC01215 - IFT57
LINC02763
CPNE7
THRB-AS1
RN7SKP224 - FOXN2
RN7SKP68 - SLCO6A1
FBLIM1P1 - DCAF12L2
TM4SF19-DYNLT2B
ADGRB3
ARHGAP44
TBC1D19 - STIM2
NR4A2 - GPD2
VENTXP1 - AMZ2P3
GNAI2P1 - RPL30P11
RTKN2
NLGN1
SPG7
MYT1L
MIR5007 - HNF4GP1
PARVG
EPO
TMEM245
LINC01392 - POLR2DP2
ARL14EP-DT
PROX1-AS1
GIGYF1 - POP7
RNU6-111P - RPSAP28
RNU6-480P - RNU6-1296P
LINC02494 - LINC02619
FLYWCH1P1 - FXR1
SEC14L2
SEC14L6 - GAL3ST1
LARGE1
PIK3C2A
FEZF1 - CADPS2
EFR3B
LGMNP1 - STARP1
ABHD5 - RNU6-367P
EZRP1 - ALCAM
ATG2A
SPOCK3
CERS6
EMSY
HSBP1L1
EEF1A2 - PPDPF
FLRT1
NFIX
SEMA3A
ZNF407
HOMER2
LPCAT4 - ACTG1P15
EVI5
DOCK1
GDNF
CDH12 - Y_RNA
LCORL - LINC02438
LINC01811
TRPS1 - LINC00536
RPL29P29 - LINC00433
MIR9-3HG
SIRLNT - ZMAT4
ZFPM2
LINC02267
RAB11AP2 - GGTA2P
GTF2IP7 - RABGEF1P3
FUT8 - NCOA4P1
SLAMF1 - SETP9
LINC02033
H2AC10P
ARHGEF26
ZBED4
CNNM3
TLE1-DT
LINC01173 - SH3BP4
GYPB
CLIP1 - ZCCHC8
CALB2
PITPNC1
NUFIP2
LINC00923
TRPC4 - LINC02334
LINC02144
UTP4
HMGA2 - MIR6074
PPIAP14 - LINC01892
TLE4
HNRNPA1P39 - LINC01305
ARHGAP28
PFKFB2
SP7 - SP1
LINC01782 - RNA5SP472
LINC00636 - CD47
CRIP1P1 - TMEM40
CSRP2
TUBBP2 - OR7E36P
LINC01414
RPLP0P9 - LINC01947
SND1 - MIR129-1
ATOSA - ONECUT1
SHANK3
EFNA3 - Y_RNA
RNA5SP63 - U3
MYO16
PPP1R26
C9orf57
GABRB1
CWC22 - SCHLAP1
PHF21A
UGGT2 - HS6ST3
LINC01098
LINC03051 - IGSF11
CHST2
PRKCB
ELAC2
NMD3 - EEF1GP4
PANK1-AS1
PCDH7 - LINC02497
OLFM3
ANKRD31 - HMGCR
KLF17
HSPB1 - FPASL
FTLP18 - GRIK3
BORCS7-ASMT - CNNM2
LINC03101 - CTDP1-DT
RN7SL607P - MRPS11P1
GPC6
TRAPPC3
PRORP
LINC00457
BRINP1 - LINC01613
MIR217HG
DOP1A
NPC1L1 - DDX56
RASIP1
MYO5A
TLCD3B
SPTBN1-AS2 - EML6
TRIM36 - PGGT1B
PTPRK
CCDC85A - PPIAP63
FAM50A
RCOR2 - NAA40
KCTD9P6 - RNA5SP261
QKI
RNU6-259P - LINC01889
PRICKLE2
PRKG1-AS1
EEFSEC
RPL31P12 - RNU6-1246P
RNU7-134P - CCDC182
ZCCHC14
NUP50 - KIAA0930
PDCD10
UBE3B - MMAB
RN7SL117P - RNA5SP87
ALG12
PELI2
SPI1
NGF-AS1
RPL14P5 - CRLF2
CNTN1
GARIN3P1 - CAAP1
KRT8P21 - RN7SKP19
NTRK3
KDM4C - RPL4P5
Y_RNA - LINC01689
NRP1 - LINC02628
VWC2L
UQCC6
SLC8A1
MMADHC-DT
LRFN2 - UNC5CL
TRA2B - NMRAL2P
C4orf36
GALNT13-AS1 - RNA5SP107
TENT4A
LINC00431 - LINC00368
RN7SKP120 - TUSC1
PLEKHA7
ARNILA - DTNB
CCDC60 - TMEM233
LINC02731
LINC01694 - PCBP3
SAMMSON
RNU6-939P - QPCT
ROBO1 - HMGB1P38
LINC01911
NDUFS5P2 - RPL7P9
LINC00606
RN7SL100P
INHBA
TRPM6
LINC02755
UBAP2
STOX1
SAMMSON - COX6CP6
SECISBP2L
NPTX1
C1QTNF12 - UBE2J2
AGBL5
YWHAB
UBE2D2
FCF1P10 - SOCS5P5
RFX2
LRFN2
LINC01720
NMNAT2
TMED7 - H3P24
SOAT1
RNU6-169P - LINC01825
ZNRF3
ZFX - SUPT20HL2
LINC00681 - TRMT9B
RPL21P59 - RPL7P20
TAB1 - MGAT3
PTPRH
Y_RNA - TRA2A
LY6H - GPIHBP1
SRSF6
VDAC1P12 - LINC02343
ZMAT4
TRIM33 - PKMP1
ZCCHC7
HECW2
ANKRD27
DLC1 - SGCZ
CSDE1 - SIKE1
INKA2
FAM168A - PLEKHB1
TAF9P3 - ZNF536
LINC02775 - SMYD2
HDAC2-AS2
NRXN3 - DIO2
LINC02144 - TMEM161B
RCN1P1 - ZNF292
RANGAP1 - ZC3H7B
KCNQ3
RN7SL147P - SYN2
TMEM182
METAP1D
GRID1
EDEM3
LINC01320
LINC00701 - LINC02645
ARC - JRK
GALNT2
IL20RB - RNA5SP142
GLIS3
PYDC2-AS1 - Y_RNA
ASAP1
FSTL5
LINC01951 - ARL2BPP6
NTM
TRIM9 - TMX1
ASCL1 - C12orf42-AS1
AK4
MOCS3 - KCNG1
SEMA3F-AS1
PAK2 - SENP5
ERVH48-1 - MIR5692B
LINC02511
SNX29
ZFAND2B
LINC02240 - RPSAP37
GRIN2B
TRA2A - CLK2P1
LILRP2
ST13P7 - EXOC4
LINC02778 - LINC01748
TAL2 - TMEM38B
SETD7
MRPS33
LINC02237 - RNU4-37P
PCDH7
BRSK2
LINC01990 - BBX
MCHR1 - SLC25A17
Y_RNA - ANG
ACO2
IGBP1P5 - RN7SL101P
PACSIN3 - DDB2
LINC02232
GNAT1 - SLC38A3
SEPHS1P2 - LINC01579
SLCO6A1 - LINC00492
RN7SL148P - SPMIP3
Y_RNA - ADAMTS6
LINC02459 - TBX5
Y_RNA - SCAMP1-AS1
EIF3FP3 - LINC01795
LINC01149 - HCP5
LINC02214 - RPL35AP15
ZNF318 - ABCC10
MARK2
ZNF385B
LINC03046
NEURL1
LINC00333 - LINC00375
MSGN1 - KCNS3
RANBP3L - RNA5SP181
RBX1 - Y_RNA
NXPH1 - GAPDHP68
ERCC8
RASA3 - CFAP97D2
MTHFD1L
LINC02326 - RNU11-5P
ARVCF
FAM83D
MIR4472-1 - LINC00051
MMD
TNR - LINC01657
EPHB1 - SDHBP1
PARD6G
MTND4P3 - RNA5SP231
RN7SL361P - IFITM3P9
TIMM17BP1 - LINC02378
CTNNA2
CAMK2B - NUDCD3
ARHGAP18
ATXN1
LINC00578
SRSF1P1 - KLHL1
DCBLD1
FAM228B
RPL3P11 - ATP5PDP3
LHFPL3
CACNA1G
C12orf43
SOBP
STK32B
RN7SL363P - FURIN
NEPNP - NUS1
FILNC1 - LINC02941
SLC8A3
DLG1
PPP3R1 - CNRIP1
APTX
IGFBP7-AS1
CADPS
SOSTDC1
DHRS4-AS1
BMP3 - PRKG2
RFX3
PCNT
NFASC
LINGO1
SYT12
DEPDC1B - KRT8P31
SRRM1
RNA5SP41 - PRDM2
APBA1
SLC25A48
ZFHX4 - MIR3149
PTPRT
LRP1B
ST3GAL1-DT - LINC03024
CLC - LEUTX
PDGFD
RPL35AP34 - SHISA9
OSBP2
FZD1 - LINC02932
PTPRG
PDC-AS1 - PTGS2
LINC00862
STK4
CLIP1
PIK3R1 - VWA8P1
ZDHHC20
ANKRD36
ITPR3
TSPAN2
AUTS2 - GALNT17
RAB11FIP5 - NOTO
HS3ST4 - LINC02195
KLHL29
BICC1
LINC02828
DLGAP2
KCNN3 - PMVK
RMND5A
TMEM132D
RNU6-649P - LINC01248
RAB8B
SHISA6
ARL14EP - RPL12P30
ZBTB7B
CLDN10
MIRLET7BHG
KYAT1
ATXN8OS
Y_RNA - MKNK2P1
RN7SL51P - RN7SL18P
IL2 - IL21
CBR4-DT - SH3RF1
MACROD1 - STIP1
LINC02789 - RNU6-778P
PCDHGA5
PGM3
C10orf67
MALINC1
HECTD1
VCAM1 - EXTL2
C5orf63
XRN2
DOP1B
GID4 - DRG2
KIRREL3
SERGEF
TRHDE
SLC8A1-AS1
PGBD4P2 - YWHAB
LRRN2
LINC01122
HNF4GP1 - SPATA2P1
RN7SL7P - SAMD9
MAP9-AS1 - MTCYBP17
LINC02008
RPS6P15 - GPAM
SIPA1L3
DBF4P1 - RPL17P35
LNCOC1
PHB1P11 - ACTBP11
CYRIB
ANKLE2
LINC01019
PCDHA1 - PCDHB1-AS1
LINC01491
NUCB2
RABGAP1L
UHRF1 - KDM4B
LNPK - EVX2
CYTH3
B9D1
YWHAQP9 - RNU6-725P
EFCAB14P1 - SFPQ
LINC01609 - LINC02237
LY75-CD302
SDK1
MYOSLID
ADRA1D - RPL7AP12
BUB3P1 - EIF3IP1
DMD
FAM110B - UBXN2B
LRCH1
HS6ST3
RPL13P2 - CD40
Y_RNA - CARS1P2
ZNF385D
PLXNA2
TRPS1
YPEL1
UBXN7
ANK2-AS1
KIF2B - ISCA1P3
JMJD6
ZFAND6 - FAH
PLEKHB2P1 - NFE2L3P1
RARB
ABCC8
MYO1E
SCYGR1 - MIR5703
PHF2P2
EDIL3
ACSM3
LINC02742 - EEF1A1P47
IRF4 - EXOC2
MIR3169 - PCDH20
LINC02881 - CXCL12
RNU6-929P - BMP7
LINC01255
DYM-AS1
U6 - LINC00938
BATF2 - ARL2
PCNX3
PCBP3
DNAJB8-AS1
CDKN2AIPNLP3 - AZU1P1
FMN2
ATOH1 - SMARCAD1-DT
JKAMP
EBNA1BP2
CRB1
SH3GL3
PRKCB - LINC02194
LINC00399 - LINC00676
LINC02812 - SLC25A3P1
KIFBP
RIT1
ANKFY1
GS1-279B7.1 - RNU7-183P
FOCAD
CHMP1A
RN7SKP157 - KIF2A
MAP7D2
SPATA17
BACH2
LINC02271 - ADGRL3
TBX21 - OSBPL7
ABHD17C
MIR138-1 - TOPAZ1
EMC2
SIX3 - KRTCAP2P1
CDKN2C - MIR4421
PTBP3
SYNE1
CWC27
RNU6-499P - BIN2P1
ARID1B
RSL24D1P2 - EHBP1
RGS8 - LINC01688
SFRP2 - DCHS2
FAM120B
WWOX
ERC2
RPS3AP24 - RN7SKP106
SIRPG-AS1
RNU1-101P - H2AZP2
UPF1
NCOR2
LINC01239 - SUMO2P2
NUS1 - SLC35F1
LINC02438 - RPL21P46
LINC02058 - POLD2P1
LINC02667 - MGMT
NPVF - U3
DIAPH2
STXBP4
SNORD39 - C11orf87
KIAA0040
JPH3
SLC39A3 - SGTA
RPL10AP3 - LINC01288
GALNT13-AS1
TPT1P9 - LINC02578
DRAXIN - AGTRAP
GPBP1 - RMEL3
RNU6-655P - Y_RNA
MSR1
RNA5SP318 - PCDH15
JAM3
FOXO6
LINC01802 - CREB1
CRYAA - LINC00322
TENT4B - ADCY7
LMBR1 - NOM1
VRK1 - LINC02304
KRT18P24 - CHCHD2P9
LINC01370 - MAFB
NOL4 - DTNA
SKAP1
ZCCHC17
TMEM178B
RN7SL825P - KIF5B
CFAP58
MGLL
MED30 - EXT1
DST
RPSAP52
LINC01932 - UBLCP1
ZNF521 - RN7SL97P
ATOSA
PPFIA3
KCNQ5
EIPR1
RN7SL183P - SPACA1
FKBP9
MBD5 - RPS29P8
NRG2
KLHL3 - HNRNPA0
RNU6-506P - RNU6-1074P
SNTG2
RAB5A
LINC02582 - RN7SL401P
CSK
BUB1B-PAK6
Y_RNA - Y_RNA
TSHR - GTF2A1
SYT16
ZFTA - RN7SL596P
UBE2G1 - SPNS3
LINC01911 - RNU6-692P
RNU6-715P - RNA5SP106
VIT
MYBPC3
FAAP100
THRAP3P1 - STT3B
HCN4
KCNB1 - PTGIS
LINC01343 - RNU6-753P
[truncated: 295 more rows]
